# Supplementary material for: Allogeneic HSCT for classical BCR::ABL1-negative myeloproliferative neoplasms in children: the retrospective study of the EBMT Pediatric Diseases WP
Source: Research Square preprint supplement (doi:10.21203/rs.3.rs-3609706/v1), 2023-11-23
Supplement: Supplementary file 1 [file 28814bf3b5f2688f7a3510d6.xlsx]

## Sheet: Description
Variables	Modalities	N=42	MSD (N=21)	Non MSD (N=21)	Test p-value	[2000-2007] (N=20)	[2008-2022] (N=22)	Test p-value		Outcomes	N	N event at 6y	Estimation (95%CI)
MPN status at transplant	PMF	33 (78.6)	17 (81)	16 (76.2)	Not done	16 (80)	17 (77.3)	Not done		Median FU (y)	42		6.8 ( 3.2 - 11.2 )
	ET	3 (7.1)	1 (4.8)	2 (9.5)		1 (5)	2 (9.1)			OS (6 y)	42	12	68.6 ( 51.1 - 80.9 )
	PV	1 (2.4)	0 (0)	1 (4.8)		0 (0)	1 (4.5)			PFS (6 y)	42	14	64.9 ( 47.9 - 77.6 )
	sAML (trans from sMF or PV or ET)	3 (7.1)	3 (14.3)	0 (0)		3 (15)	0 (0)			Poly recovery (30 d)	42	32	76.2 ( 59.7 - 86.6 )
	sMF (trans from ET or PV)	1 (2.4)	0 (0)	1 (4.8)		0 (0)	1 (4.5)			Poly recovery (60 d)	42	36	85.7 ( 69.7 - 93.6 )
	sMF (trans from ET)	1 (2.4)	0 (0)	1 (4.8)		0 (0)	1 (4.5)			Platelet recovery (>=20) (60 d)	37	29	78.4 ( 60.5 - 88.9 )
Age at diagnosis	median [IQR]	4.5 [1.4-10.3]	4.6 [1.5-11.3]	4.4 [1.1-6.9]	0.5	5.6 [1.3-10.8]	4.5 [1.6-6.5]	0.95		Platelet recovery (>=20) (180 d)	37	31	83.8 ( 66 - 92.7 )
	(range)	(0.1-17.7)	(0.1-17.7)	(0.3-16.9)		(0.1-17.4)	(0.4-17.7)			aGVH-II/IV (100 d)	39	14	35.9 ( 21.1 - 50.9 )
Age at transplant	median [IQR]	6.1 [2.7-12]	6.8 [1.9-12.4]	5.7 [3-11.4]	0.87	8.9 [2.8-12.2]	5.7 [2.7-6.7]	0.55		aGVH-III/IV (100 d)	39	4	10.3 ( 3.2 - 22.2 )
	(range)	(0.4-18)	(0.4-18)	(0.9-17.7)		(0.4-17.6)	(0.9-18)			GRFS (6 y)	38	18	49.1 ( 31.5 - 64.6 )
Year of transplant	median [IQR]	2008 [2005-2015]	2007 [2004-2012]	2011 [2005-2016]	0.16	2005 [2003-2006.2]	2015 [2011.2-2018]	Not done		RI (6 y)	42	7	17.8 ( 7.7 - 31.4 )
	(range)	(2000-2022)	(2002-2021)	(2000-2022)		(2000-2007)	(2008-2022)			NRM (6 y)	42	7	17.2 ( 7.4 - 30.5 )
Months between diag and transplant	median [IQR]	8.4 [4.7-15]	4.9 [3.2-9.2]	11 [7.3-17.2]	0.008	8.4 [4.6-20.8]	8.7 [4.7-13.4]	0.86		Second TX (6 y)	42	7	17.3 ( 7.5 - 30.5 )
	(range)	(1.2-136.4)	(1.2-101)	(3.1-136.4)		(1.2-136.4)	(2-62.4)			CGVHD (6 y)	39	6	16.6 ( 6.5 - 30.6 )
Hemoglobin before start of conditioning (g/dL)	median [IQR]	9.0 [8.4-10.5]	8.9 [8.4-10.5]	9.1 [8-10.9]	0.71	9 [8.4-10.5]	9.4 [8.4-10.7]	0.53		CGVHD Ext (6 y)	38	4	12.4 ( 3.6 - 26.8 )
	(range)	(5.9-118)	(5.9-14.5)	(6.5-118)		(5.9-14.5)	(6-118)
	missing	13	5	8		3	10
White Blood cells (leukocytes) before start of conditioning (10^9/L)	median [IQR]	6.3 [3.7-10.5]	10 [4.5-11.6]	5.9 [3.5-6.8]	0.22	6.7 [3-10.6]	5.7 [4-9.2]	0.79
	(range)	(1.1-25.6)	(1.1-25.6)	(2.4-10.7)		(1.1-14.5)	(2.9-25.6)
	missing	12	5	7		3	9
Platelets before start of conditioning (10^9/L)	median [IQR]	110.5 [43-386.5]	88.5 [58.2-431.8]	125 [37.8-275.5]	0.79	79 [39-128]	172 [65-543]	0.09
	(range)	(1-1505)	(22-1505)	(1-1191)		(1-719)	(18-1505)
	missing	12	5	7		3	9
Patient sex	Female	17 (40.5)	8 (38.1)	9 (42.9)	0.75	8 (40)	9 (40.9)	0.95
	Male	25 (59.5)	13 (61.9)	12 (57.1)		12 (60)	13 (59.1)
Female to male	No	34 (81)	18 (85.7)	16 (76.2)	0.70 f	16 (80)	18 (81.8)	1 f
	Yes	8 (19)	3 (14.3)	5 (23.8)		4 (20)	4 (18.2)
Source of cells	BM	21 (50)	15 (71.4)	6 (28.6)	0.004 f	9 (45)	12 (54.5)	0.53 f
	PB	15 (35.7)	6 (28.6)	9 (42.9)		9 (45)	6 (27.3)
	CB & double CB	6 (14.3)	0 (0)	6 (28.6)		2 (10)	4 (18.2)
Donor type	Identical sibling	21 (50)	21 (100)		Not done	12 (60)	9 (40.9)	Not done
	Matched other relative	3 (7.1)		3 (14.3)		2 (10)	1 (4.5)
	Haplo	3 (7.1)		3 (14.3)		0 (0)	3 (13.6)
	CB (Haplo)	1 (2.4)		1 (4.8)		0 (0)	1 (4.5)
	UD 10/10	5 (11.9)		5 (23.8)		2 (10)	3 (13.6)
	UD 9/10	2 (4.8)		2 (9.5)		0 (0)	2 (9.1)
	UD (HLA not reported)	2 (4.8)		2 (9.5)		2 (10)	0 (0)
	UCB 5/6	4 (9.5)		4 (19)		1 (5)	3 (13.6)
	Double UCB (2/6 ; 3/6)	1 (2.4)		1 (4.8)		1 (5)	0 (0)
Conditionning regimen	BuCy	20 (47.6)	15 (71.4)	5 (23.8)	Not done	14 (70)	6 (27.3)	Not done
	BuCy+Flu	1 (2.4)	0 (0)	1 (4.8)		1 (5)	0 (0)
	BuCy+Flu+Arac	1 (2.4)	1 (4.8)	0 (0)		0 (0)	1 (4.5)
	BuCy+Mel	3 (7.1)	1 (4.8)	2 (9.5)		2 (10)	1 (4.5)
	BuFlu	3 (7.1)	1 (4.8)	2 (9.5)		0 (0)	3 (13.6)
	BuFlu+Thio	1 (2.4)	1 (4.8)	0 (0)		0 (0)	1 (4.5)
	Cy+Flu	1 (2.4)	1 (4.8)	0 (0)		0 (0)	1 (4.5)
	FluMel	2 (4.8)	1 (4.8)	1 (4.8)		2 (10)	0 (0)
	TBI alone	1 (2.4)	0 (0)	1 (4.8)		1 (5)	0 (0)
	TBI+BuCy+Flu	1 (2.4)	0 (0)	1 (4.8)		0 (0)	1 (4.5)
	Treo+Cy+Mel	1 (2.4)	0 (0)	1 (4.8)		0 (0)	1 (4.5)
	Treo+Flu	1 (2.4)	0 (0)	1 (4.8)		0 (0)	1 (4.5)
	Treo+Flu+Thio	6 (14.3)	0 (0)	6 (28.6)		0 (0)	6 (27.2)
Myeloablative regimen	No	2 (5.1)	1 (5)	1 (5.3)	1 f	1 (5.3)	1 (5)	1 f
	Yes	37 (94.9)	19 (95)	18 (94.7)		18 (94.7)	19 (95)
	missing	3	1	2		1	2
Invivo TCD	No	13 (32.5)	11 (55)	2 (10)	0.002	9 (50)	4 (18.2)	0.03
	Yes	27 (67.5)	9 (45)	18 (90)		9 (50)	18 (81.8)
	missing	2	1	1		2	0
Invivo TCD	No	13 (32.5)	11 (55)	2 (10)	Not done	9 (50)	4 (18.2)	Not done
	ATG	22 (55)	9 (45)	13 (65)		8 (44.4)	14 (63.6)
	Campath	5 (12.5)	0 (0)	5 (25)		1 (5.6)	4 (18.2)
	missing	2	1	1		2	0
Exvivo TCD	No	33 (78.6)	18 (85.7)	15 (71.4)	0.45 f	14 (70)	19 (86.4)	0.27 f
	Yes	9 (21.4)	3 (14.3)	6 (28.6)		6 (30)	3 (13.6)
GVHD prophilaxis	ATG only	2 (5)	1 (5)	1 (5)	Not done	1 (5.6)	1 (4.5)	Not done
	CSA	7 (17.5)	1 (5)	6 (30)		3 (16.7)	4 (18.2)
	CSA+MMF	3 (7.5)	1 (5)	2 (10)		0 (0)	3 (13.6)
	CSA+MMF+TACRO	2 (5)	0 (0)	2 (10)		0 (0)	2 (9.1)
	CSA+MTX	24 (60)	16 (80)	8 (40)		14 (77.8)	10 (45.5)
	MTX	1 (2.5)	1 (5)	0 (0)		0 (0)	1 (4.5)
	PTCY+CSA	1 (2.5)	0 (0)	1 (5)		0 (0)	1 (4.5)
	missing	2	1	1		2	0
CMV donor to patient	Neg to Neg	8 (26.7)	2 (13.3)	6 (40)	0.07 f	2 (22.2)	6 (28.6)	0.07 f
	Neg to Pos	3 (10)	1 (6.7)	2 (13.3)		2 (22.2)	1 (4.8)
	Pos to Neg	8 (26.7)	3 (20)	5 (33.3)		0 (0)	8 (38.1)
	Pos to Pos	11 (36.7)	9 (60)	2 (13.3)		5 (55.6)	6 (28.6)
	missing	12	6	6		11	1
Lansky	< 80	6 (15.4)	5 (25)	1 (5.3)	0.18 f	4 (21.1)	2 (10)	0.41 f
	>= 80	33 (84.6)	15 (75)	18 (94.7)		15 (78.9)	18 (90)
	missing	3	1	2		1	2
Lansky	< 90	9 (23.7)	5 (25)	4 (22.2)	1 f	5 (27.8)	4 (20)	0.71 f
	>= 90	29 (76.3)	15 (75)	14 (77.8)		13 (72.2)	16 (80)
	missing	4	1	3		2	2
% of blast in bone marrow or peripheral blood at start of conditioning regimen	0	15 (62.5)	8 (61.5)	7 (63.6)	1 f	8 (66.7)	7 (58.3)	0.67 f
	<5%	8 (33.3)	4 (30.8)	4 (36.4)		3 (25)	5 (41.7)
	6	1 (4.2)	1 (7.7)	0 (0)		1 (8.3)	0 (0)
	missing	18	8	10		8	10
Transfusion requirement before the start of conditioning	No	8 (32)	6 (40)	2 (20)	0.40 f	4 (26.7)	4 (40)	0.67 f
	Yes	17 (68)	9 (60)	8 (80)		11 (73.3)	6 (60)
	missing	17	6	11		5	12
Iron overload before the start of conditioning	No	25 (96.2)	14 (100)	11 (91.7)	0.46 f	13 (100)	12 (92.3)	1 f
	Yes	1 (3.8)	0 (0)	1 (8.3)		0 (0)	1 (7.7)
	missing	16	7	9		7	9
Chelation therapy before the start of conditioning in case of iron overload	No	26 (100)	14 (100)	12 (100)	Not done	13 (100)	13 (100)	Not done
	missing	16	7	9		7	9
Thrombotic events before the start of conditioning	No	21 (84)	13 (86.7)	8 (80)	1 f	12 (85.7)	9 (81.8)	1 f
	Yes	4 (16)	2 (13.3)	2 (20)		2 (14.3)	2 (18.2)
	missing	17	6	11		6	11
Hemorrhagic events before the start of conditioning	No	23 (85.2)	14 (93.3)	9 (75)	0.29 f	13 (86.7)	10 (83.3)	1 f
	Yes	4 (14.8)	1 (6.7)	3 (25)		2 (13.3)	2 (16.7)
	missing	15	6	9		5	10
Spleen irradiation prior the start of conditioning	No	30 (100)	16 (100)	14 (100)	Not done	17 (100)	13 (100)	Not done
	missing	12	5	7		3	9
Patient had splenectomy prior the start of conditioning	No	29 (96.7)	16 (100)	13 (92.9)	0.47 f	16 (94.1)	13 (100)	1 f
	Yes	1 (3.3)	0 (0)	1 (7.1)		1 (5.9)	0 (0)
	missing	12	5	7		3	9
Palpable splenomegaly prior the start of conditioning	Absent	15 (53.6)	9 (56.2)	6 (50)	0.74	10 (58.8)	5 (45.5)	0.49
	Present	13 (46.4)	7 (43.8)	6 (50)		7 (41.2)	6 (54.5)
	missing	14	5	9		3	11
f: Fisher exact test

## Sheet: Univariate_outcomes
	Variables	Modalities	n	6y NRM	6y RI	6y PFS	2y GRFS	6y OS
	Total		42	17.2 (7.4-30.5)	17.9 (7.7-31.5)	64.9 (47.8-77.6)	49.1 (31.5-64.6)	68.6 (51.1-80.9)
	Year of HSCT	[2000-2007]	20	20 [5.9-40]	30 [11.7-50.8]	50 [27.1-69.2]	40.6 [18.6-61.7]	54.5 [30.7-73.2]
		[2008-2022]	22	13.6 [3.3-31.3]	4.5 [0.3-19.5]	81.8 [58.5-92.8]	61.2 [35-79.5]	86.4 [63.4-95.4]
		P value		0.72	0.046	0.08	0.45	0.08
	Age at HSCT	(0-6)		17.1 [3.8-38.7]	11.5 [1.7-31.8]	71.3 [43.4-87.2]	59.5 [29.4-80.3]	75.5 [46.2-90.3]
		[7-18)		18.2 [5.5-36.8]	22.7 [7.9-42]	59.1 [36.1-76.2]	40 [19.3-60]	62.5 [38.5-79.3]
		P value		0.84	0.35	0.35	0.1	0.38
	Recipient sex	Male	25	21.8 [7.4-40.9]	22.8 [7.8-42.4]	55.5 [32.4-73.5]	42.2 [20.6-62.4]	63.1 [38.8-80]
		Female	17	11.8 [1.8-32]	11.8 [1.8-32]	76.5 [48.8-90.4]	60 [31.8-79.7]	76.5 [48.8-90.4]
		P value		0.43	0.4	0.21	0.4	0.37
	MPN status at HSCT	PMF	33	19.1 [7.5-34.7]	17 [6-32.8]	63.9 [44-78.3]	50 [29.8-67.3]	69 [48.5-82.7]
		Other	9	11.1 [0.4-41.2]	22.2 [2.8-53.1]	66.7 [28.2-87.8]	42.9 [9.8-73.4]	66.7 [28.2-87.8]
		P value		0.59	0.6	0.93	0.55	0.84
	Months between diagnosis and HSCT	[1-8)		16.8 [3.9-37.6]	17.5 [4-38.9]	65.7 [38.8-83]	52.7 [26.7-73.3]	71.3 [44.1-87]
		[9-136]		17.4 [5.2-35.5]	18 [5.3-36.7]	64.6 [41.4-80.5]	46.3 [23.2-66.7]	67.2 [42.8-83]
		P value		0.86	0.83	0.68	0.37	0.63
	Donor type	MSD	21	10.1 [1.6-28.3]	19.9 [5.9-39.9]	69.9 [44.7-85.3]	61.8 [36-79.7]	68.5 [42.5-84.6]
		Other	21	23.8 [8.3-43.6]	15.9 [3.6-36.1]	60.3 [35.7-78]	37.2 [15.3-59.4]	69.3 [43.6-85.1]
		P value		0.22	0.73	0.47	0.16	0.82
	Source of cells	BM	21	0	19.9 [5.9-39.8]	80.1 [55.2-92.1]	65.8 [39.1-83]	83.5 [56.7-94.5]
		Other	21	35.3 [14.9-56.5]	16.3 [3.7-37]	48.4 [25-68.5]	34.3 [13.8-56.1]	51.4 [26.7-71.5]
		P value		0.004	0.72	0.04	0.11	0.02

## Sheet: Patients_dead_relapse_secHSCT
	Age at HSCT	Year of HSCT	Disease at HSCT	Donor type	Source of cells	Conditioning regimen	Exvivo TCD	Invivo TCD	GVHD prevention	ANC recovery (days)	Platelet recovery (days)	Acute GVH	Second HSCT and DLI before relapse	ANC recovery (days)	Acute GVH after second HCT	Chronic GVH	Relapse (days)	Second HSCT and DLI post relapse	ANC recovery (days)	Survival status (days)	Cause of death
	17.3634	2011	PMF	MSD	PB	Cy+Flu	No	ATG	CSA+MTX	No	Missing	No				No	No			Dead (13)	Graft failure
	1.74949	2013	PMF	UCB 5/6		Treo+Flu+Thio	No	ATG	CSA+MMF	No	No	No				No	No			Dead (32)	Graft failure
	5.69747	2015	PV	Haplo	PB	Treo+Flu+Thio	Yes	ATG	CSA+MMF+TACRO	No	Yes (11)	No	HSCT (42)	No	No	No	No			Dead (74)	Graft failure
	9.79055	2004	sAML	MSD	BM	BuCy	No	No	CSA+MTX	Yes (20)	No	No				No	Yes (61)			Dead (61)	Relapse+GVHD
	11.6742	2000	PMF	UD*	PB	TBI alone	Yes	NA	missing	Yes (17)	Missing	Grade IV				No	No			Dead (62)	GVHD
	14.8775	2007	PMF	Double UCB (2/6; 3/6)		BuCy	No	No	CSA	Yes (40)	No	Grade IV (15)				No	No			Dead (109)	GVHD
	17.6235	2005	PMF	UD 10/10	PB	BuCy+Flu	Yes	No	CSA+MTX	Yes (21)	Yes (21)	Grade II				No	No			Dead (102)	GVHD
	17.5113	2003	PMF	MSD	PB	FluMel	No	ATG	ATG only	Yes (63)	Yes (63)	No				No	Yes (338)	HSCT (356)	Yes (369)	Dead (394)	Relapse
	2.96235	2007	PMF	UCB 5/6		BuCy	Yes	ATG	CSA	Yes (24)	Yes (57)	Grade II (50)				No	Yes (444)			Dead (444)	Relapse
	4.67351	2003	PMF	MSD	PB	BuCy	No	NA	missing	Yes (33)	Yes (189)	No				No	No			Dead (644)	Graft failure
	9.82888	2004	sAML	MSD	BM	BuCy	No	No	CSA+MTX	Yes (25)	Yes (21)	Grade IV (18)				No	Yes (49)	DLI (149 & 328 & 524)		Dead (757)	Relapse
	12.4435	2002	PMF	MSD	BM	BuCy+Mel	No	No	CSA+MTX	Yes (19)	Yes (33)	Grade II (72)				No	Yes (597)	DLI (651)		Dead (1100)	Relapse
	4.00274	2019	PMF	CB Haplo		TBI+BuCy+Flu	No	ATG	CSA	No	Missing	Missing	HSCT (50)	Yes (76)	Grade I (111)	Missing	No			Alive (413)
	0.889802	2021	PMF	UCB 5/6		BuFlu	No	ATG	CSA+MMF	No	No	No	HSCT (147)	Yes (175)	No	No	No			Alive (248)
	5.61259	2022	PMF	Haplo	PB	Treo+Flu+Thio	Yes	ATG	ATG only	No	No	No	HSCT (26)	Missing	Missing	No	Yes (101)			Alive (101)
	7.33744	2003	PMF	UD*	BM	BuCy+Mel	No	Campath	CSA+MTX	Yes (17)	Yes (21)	No				No	Yes (209)	HSCT (274)	Yes (296)	Alive (6184)
	6.13279	2016	ET	UD 10/10	BM	Treo+Flu+Thio	No	ATG	CSA+MTX	Yes (35)	Yes (33)	Grade I	DLI (135) and HSCT (230)	Yes (242)	Grade IV (238)	Yes (101)	No			Alive (1186)
	*HLA not reported

## Sheet: Centre
Rank	Centre	N
1	Amman [King Hussein], 580	9 (21.4)
2	Riyadh [King Faisal]_duplicated_981, 981	5 (11.9)
3exaequo	Manchester [Royal Children`s H], 521	2 (4.8)
3exaequo	Paris [Robert Debre], 631	2 (4.8)
3exaequo	Paris [St Louis], 207	2 (4.8)
3exaequo	Prague [U H Motol], 452	2 (4.8)
3exaequo	Regensburg [University], 787	2 (4.8)
8exaequo	Alger [P et M Curie], 703	1 (2.4)
8exaequo	Bratislava [Paediatric Univ], 684	1 (2.4)
8exaequo	Budapest [St. László H], 824	1 (2.4)
8exaequo	Essen [Univ H], 259	1 (2.4)
8exaequo	Jena [U, Pediatrics], 750	1 (2.4)
8exaequo	Jerusalem [Univ Hadassah], 258	1 (2.4)
8exaequo	Kayseri [Erciyes Hem], 627	1 (2.4)
8exaequo	London [Great Ormond], 243	1 (2.4)
8exaequo	Madrid [La Paz], 734	1 (2.4)
8exaequo	Madrid [Niño Jesus], 732	1 (2.4)
8exaequo	Monza [S Gerardo], 279	1 (2.4)
8exaequo	Nantes [Hotel Dieu], 253	1 (2.4)
8exaequo	Poznan [Univ Med Sci], 641	1 (2.4)
8exaequo	Riyadh [King Faisal], 397	1 (2.4)
8exaequo	Rome [IMH Tor Vergata], 383	1 (2.4)
8exaequo	Sheffield [Royal Hallamshire], 778	1 (2.4)
8exaequo	Tel-Hashomer [Chaim Sheba Paed], 572	1 (2.4)
8exaequo	Utrecht [Maxima Ped Onc], 352	1 (2.4)
