# Supplementary material for: Allogeneic HSCT for classical BCR::ABL1-negative myeloproliferative neoplasms in children: the retrospective study of the EBMT Pediatric Diseases WP
Source: Research Square preprint supplement (doi:10.21203/rs.3.rs-3609706/v1), 2023-11-23
Supplement: Supplementary file 2 [file 3b6661f973786908528cfc98.xlsx]

## Sheet: Arkusz1
Variable	Modality	N	MSD	Non-MSD	Test p-value	[2000-2007]	[2008-2022]	Test p-value
Total		42	21	21		20	22
Donor type	Identical sibling	21 (50)	21 (100)		Not done	12 (60)	9 (40.9)	Not done
	Matched other relative	3 (7.1)		3 (14.3)		2 (10)	1 (4.5)
	Haploidentical	3 (7.1)		3 (14.3)		0 (0)	3 (13.6)
	CB (haploidentical)	1 (2.4)		1 (4.8)		0 (0)	1 (4.5)
	UD 10/10	5 (11.9)		5 (23.8)		2 (10)	3 (13.6)
	UD 9/10	2 (4.8)		2 (9.5)		0 (0)	2 (9.1)
	UD (HLA not reported)	2 (4.8)		2 (9.5)		2 (10)	0 (0)
	UCB 5/6	4 (9.5)		4 (19)		1 (5)	3 (13.6)
	Double UCB (2/6 ; 3/6)	1 (2.4)		1 (4.8)		1 (5)	0 (0)
Female donor to male recipient	No	34 (81)	18 (85.7)	16 (76.2)	0.70 f	16 (80)	18 (81.8)	1 f
	Yes	8 (19)	3 (14.3)	5 (23.8)		4 (20)	4 (18.2)
Source of cells	BM	21 (50)	15 (71.4)	6 (28.6)	0.004 f	9 (45)	12 (54.5)	0.53 f
	PB	15 (35.7)	6 (28.6)	9 (42.9)		9 (45)	6 (27.3)
	CB & double CB	6 (14.3)	0 (0)	6 (28.6)		2 (10)	4 (18.2)
Conditioning regimen	BuCy	20 (47.6)	15 (71.4)	5 (23.8)	Not done	14 (70)	6 (27.3)	Not done
	BuCy+Flu	1 (2.4)	0 (0)	1 (4.8)		1 (5)	0 (0)
	BuCy+Flu+Arac	1 (2.4)	1 (4.8)	0 (0)		0 (0)	1 (4.5)
	BuCy+Mel	3 (7.1)	1 (4.8)	2 (9.5)		2 (10)	1 (4.5)
	BuFlu	3 (7.1)	1 (4.8)	2 (9.5)		0 (0)	3 (13.6)
	BuFlu+Thio	1 (2.4)	1 (4.8)	0 (0)		0 (0)	1 (4.5)
	Cy+Flu	1 (2.4)	1 (4.8)	0 (0)		0 (0)	1 (4.5)
	FluMel	2 (4.8)	1 (4.8)	1 (4.8)		2 (10)	0 (0)
	TBI alone	1 (2.4)	0 (0)	1 (4.8)		1 (5)	0 (0)
	TBI+BuCy+Flu	1 (2.4)	0 (0)	1 (4.8)		0 (0)	1 (4.5)
	Treo+Cy+Mel	1 (2.4)	0 (0)	1 (4.8)		0 (0)	1 (4.5)
	Treo+Flu	1 (2.4)	0 (0)	1 (4.8)		0 (0)	1 (4.5)
	Treo+Flu+Thio	6 (14.3)	0 (0)	6 (28.6)		0 (0)	6 (27.2)
Myeloablative regimen	No	3 (7.3)	2 (9.5)	1 (5)	1 f	2 (10.5)	1 (4.5)	1 f
	Yes	38 (92.7)	19 (90.5)	19 (95)		17 (89.5.7)	21 (95.5)
	missing	3	1	2		1	2
GVHD prophylaxis	ATG only	2 (5)	1 (5)	1 (5)	Not done	1 (5.6)	1 (4.5)	Not done
	CSA	7 (17.5)	1 (5)	6 (30)		3 (16.7)	4 (18.2)
	CSA+MMF	3 (7.5)	1 (5)	2 (10)		0 (0)	3 (13.6)
	CSA+MMF+TACRO	2 (5)	0 (0)	2 (10)		0 (0)	2 (9.1)
	CSA+MTX	24 (60)	16 (80)	8 (40)		14 (77.8)	10 (45.5)
	MTX	1 (2.5)	1 (5)	0 (0)		0 (0)	1 (4.5)
	PT-CY+CSA	1 (2.5)	0 (0)	1 (5)		0 (0)	1 (4.5)
	missing	2	1	1		2	0
TCD in vivo	No	13 (32.5)	11 (55)	2 (10)	0.002	9 (50)	4 (18.2)	0.03
	Yes	27 (67.5)	9 (45)	18 (90)		9 (50)	18 (81.8)
	missing	2	1	1		2	0
TCD in vivo - ATG vs Campath	No	13 (32.5)	11 (55)	2 (10)	Not done	9 (50)	4 (18.2)	Not done
	ATG	22 (55)	9 (45)	13 (65)		8 (44.4)	14 (63.6)
	Campath	5 (12.5)	0 (0)	5 (25)		1 (5.6)	4 (18.2)
	missing	2	1	1		2	0
TCD ex vivo	No	33 (78.6)	18 (85.7)	15 (71.4)	0.45 f	14 (70)	19 (86.4)	0.27 f
	Yes	9 (21.4)	3 (14.3)	6 (28.6)		6 (30)	3 (13.6)
