# Supplementary material for: Allogeneic HSCT for classical BCR::ABL1-negative myeloproliferative neoplasms in children: the retrospective study of the EBMT Pediatric Diseases WP
Source: Research Square preprint supplement (doi:10.21203/rs.3.rs-3609706/v1), 2023-11-23
Supplement: Supplementary file 3 [file 534fa460864572f90a41393e.xlsx]

## Sheet: Arkusz1
Variable	Modality	Total	Day +100 aGvHD grade II-IV	Day +100 aGvHD grade III-IV	2-yrs cGvHD	2-y ext cGvHD
Year of HSCT	[2000-2007]	20	45 [22.4-65.3]	15 [3.6-34]	10.5 [1.5-29.7]	6.8 [0.3-28]
	[2008-2022]	22	26.3 [9.1-47.5]	5.3 [0.3-22.1]	21.8 [6.3-43.4]	17.7 [3.9-39.6]
	P value		0.23	0.31	0.27	0.2
Age at HSCT (years)	(0-6)		38.9 [16.8-60.7]	0	13.9 [2-37]	9.9 [0.4-37.7]
	[6-18)		33.3 [14.4-53.7]	19 [5.7-38.3]	19 [5.6-38.5]	15 [3.5-34.3]
	P value		0.75	0.054	0.52	0.41
Recipient sex	Male	25	40.9 [20.2-60.7]	13.6 [3.3-31.4]	15.3 [3.4-35.1]	10.6 [1.5-30]
	Female	17	29.4 [10.2-51.9]	5.9 [0.3-24.2]	18.8 [4.3-41.2]	13.3 [2-35.6]
	P value		0.43	0.42	0.66	0.64
MPN status at HSCT	PMF	33	38.7 [21.7-55.5]	9.7 [2.4-23.2]	14.3 [4.3-30.1]	12.1 [2.6-29.4]
	Other	9	25 [3-57.9]	12.5 [0.5-44.5]	25 [2.5-59.4]	14.3 [0.3-51.3]
	P value		0.54	0.82	0.45	0.87
Donor type	MSD	21	20 [6-39.9]	5 [0.3-21.1]	11.2 [1.7-30.9]	5.6 [0.3-23.4]
	non-MSD	21	52.6 [27.7-72.6]	15.8 [3.7-35.5]	22.1 [6.3-43.9]	19.1 [4-42.6]
	P value		0.03	0.27	0.38	0.32
Source of HSC	BM	21	36.8 [15.9-58.1]	10.5 [1.7-29]	21.5 [6.3-42.5]	11.1 [1.7-30.4]
	Other	21	35 [15.1-55.9]	10 [1.6-27.8]	11.7 [1.7-32.3]	12.7 [1.8-34.8]
	P value		0.99	0.99	0.34	0.86
