# Supplementary material for: Allogeneic HSCT for classical BCR::ABL1-negative myeloproliferative neoplasms in children: the retrospective study of the EBMT Pediatric Diseases WP
Source: Research Square preprint supplement (doi:10.21203/rs.3.rs-3609706/v1), 2023-11-23
Supplement: Supplementary file 4 [file 69ab6348c56b2fbc111ee178.xlsx]

## Sheet: Arkusz1
Variable	Modality	N	MSD	Non-MSD	Test p-value	[2000-2007]	[2008-2022]	Test p-value
Total		42	21	21		20	22
Patient sex	Female	17 (40.5)	8 (38.1)	9 (42.9)	0.75	8 (40)	9 (40.9)	0.95
	Male	25 (59.5)	13 (61.9)	12 (57.1)		12 (60)	13 (59.1)
Age at diagnosis	median [IQR]	4.5 [1.4-10.3]	4.6 [1.5-11.3]	4.4 [1.1-6.9]	0.5	5.6 [1.3-10.8]	4.5 [1.6-6.5]	0.95
	(range)	(0.1-17.7)	(0.1-17.7)	(0.3-16.9)		(0.1-17.4)	(0.4-17.7)
Age at HSCT	median [IQR]	6.1 [2.7-12]	6.8 [1.9-12.4]	5.7 [3-11.4]	0.87	8.9 [2.8-12.2]	5.7 [2.7-6.7]	0.55
	(range)	(0.4-18)	(0.4-18)	(0.9-17.7)		(0.4-17.6)	(0.9-18)
MPN status at HSCT	PMF	33 (78.6)	17 (81)	16 (76.2)	Not done	16 (80)	17 (77.3)	Not done
	ET	3 (7.1)	1 (4.8)	2 (9.5)		1 (5)	2 (9.1)
	PV	1 (2.4)	0 (0)	1 (4.8)		0 (0)	1 (4.5)
	sAML (post sMF or PV or ET)	3 (7.1)	3 (14.3)	0 (0)		3 (15)	0 (0)
	sMF (post PV)	1 (2.4)	0 (0)	1 (4.8)		0 (0)	1 (4.5)
	sMF (post ET)	1 (2.4)	0 (0)	1 (4.8)		0 (0)	1 (4.5)
Months between diagnosis and HSCT	median [IQR]	8.4 [4.7-15]	4.9 [3.2-9.2]	11 [7.3-17.2]	0.008	8.4 [4.6-20.8]	8.7 [4.7-13.4]	0.86
	(range)	(1.2-136.4)	(1.2-101)	(3.1-136.4)		(1.2-136.4)	(2-62.4)
Year of HSCT	median [IQR]	2008 [2005-2015]	2007 [2004-2012]	2011 [2005-2016]	0.16	2005 [2003-2006.2]	2015 [2011.2-2018]	Not done
	(range)	(2000-2022)	(2002-2021)	(2000-2022)		(2000-2007)	(2008-2022)
Female to male	No	34 (81)	18 (85.7)	16 (76.2)	0.70 f	16 (80)	18 (81.8)	1 f
	Yes	8 (19)	3 (14.3)	5 (23.8)		4 (20)	4 (18.2)
Lansky	< 90	9 (23.7)	5 (25)	4 (22.2)	1 f	5 (27.8)	4 (20)	0.71 f
	≥ 90	29 (76.3)	15 (75)	14 (77.8)		13 (72.2)	16 (80)
	missing	4	1	3		2	2
f:Fisher exact test
