# Supplementary material for: Allogeneic HSCT for classical BCR::ABL1-negative myeloproliferative neoplasms in children: the retrospective study of the EBMT Pediatric Diseases WP
Source: Research Square preprint supplement (doi:10.21203/rs.3.rs-3609706/v1), 2023-11-23
Supplement: Supplementary file 5 [file 94360a13d8497d56520073e7.xlsx]

## Sheet: Arkusz1
Age at HSCT	Year of HSCT	MPN status at HSCT	Donor type	Source of HSC	Conditioning regimen	Ex vivo TCD	In vivo TCD	GVHD prophylaxis	Survival status (days after HSCT)	Cause of death
17.3634	2011	PMF	MSD	PB	Cy+Flu	No	ATG	CSA+MTX	Dead (13)	Graft failure
1.74949	2013	PMF	UCB 5/6		Treo+Flu+Thio	No	ATG	CSA+MMF	Dead (32)	Graft failure
5.69747	2015	PV	Haplo	PB	Treo+Flu+Thio	Yes	ATG	CSA+MMF+TACRO	Dead (74)	Graft failure
4.67351	2003	PMF	MSD	PB	Bu+Cy	No	NA	missing	Dead (644)	Graft failure
11.6742	2000	PMF	UD*	PB	TBI alone	Yes	NA	missing	Dead (62)	aGvHD grade IV
14.8775	2007	PMF	Double UCB (2/6; 3/6)		Bu+Cy	No	No	CSA	Dead (109)	aGvHD grade IV
17.6235	2005	PMF	UD 10/10	PB	Bu+Cy+Flu	Yes	No	CSA+MTX	Dead (102)	aGvHD grade II
*HLA not reported
